# Supplementary material for: Synthesis and electropolymerization of novel oligothiophene-functionalized perylene bisimides
Source: Royal Society of Chemistry journal article supplement (doi:10.1039/b407551j), 2004-01-01
Supplement: b407551j.doc [file b407551j.doc]

# Supplementary Material (ESI) for Chemical Communications

# This journal is © The Royal Society of Chemistry 2004

Supporting Information for

**Synthesis and electropolymerization of novel oligothiophene-functionalized perylene bisimides**

Chang-Cheng You, Chantu R. Saha-Möller and Frank Würthner*

*Institut für Organische Chemie, Universität Würzburg, Am Hubland, 97074 Würzburg, Germany*

***Figure S1.*** Cyclic voltammograms of methylterthienyl-functionalized perylene bisimide **3** (1.0 mM) in CH2Cl2 with different sweep directions, sweep rate 100 mV s-1. The reduction wave at 0.41 V should be ascribed to the -dimer from terthiophene radical cations.

***Figure S2.*** Cyclic voltammograms of methylterthienyl-functionalized perylene bisimide **3** (1.0 mM) in CH2Cl2 with different sweep rates: (a) 1000 mV s-1, (b) 100 mV s-1, and (c) 25 mV s-1.

***Figure S3.*** Cyclic Voltammogram of bithienyl-functionalized perylene bisimide **1** (0.5 mM) in CH2Cl2, sweep rate 100 mV s-1.

***Figure S4.*** Cyclic voltammograms of the polymer of **1** in monomer-free CH2Cl2 solution, sweep rate 100 mV s-1.

*Figure S5*. UV/Vis absorption (black line) and fluorescence excitation spectra (red line) of 2 in CH2Cl2. Excitation spectra were recorded at det=605nm.

***Figure S6*.** Fluorescence decay curve (black line) of **2** in CH2Cl2, monoexponential fit function (red line), residuals (green line) and autocorrelation (blue line). Irradiation at ex=545nm, spectra recorded at det=605nm. =1.652ns (2=0.9043, DW-Factor = 1.798).
